# Supplementary material for: Oxidative potential of particulate matter at a German motorway
Source: Royal Society of Chemistry journal article supplement (doi:10.1039/c4em00605d), 2015-01-01
Supplement: c4em00605d1.pdf [file c4em00605d1.pdf]

**S Table 1** Detailed sampling period data

| season<br>month           | spring 2006               |       |     | summer 2006 |      |      | autumn 2006 |      |      | autumn 2005 |      |       | winter 2006/07 |       |       | winter 2005/2006 |      |       |   |
|---------------------------|---------------------------|-------|-----|-------------|------|------|-------------|------|------|-------------|------|-------|----------------|-------|-------|------------------|------|-------|---|
|                           | March                     | April | May | June        | July | Aug. | Sept.       | Oct. | Nov. | Sept.       | Oct. | Nov.  | Dec.           | Jan.  | Feb.  | Dec.             | Jan. | Feb.  |   |
| day                       | 3/25                      |       |     | 6/20        | 7/27 | 8/1  | 9/1         |      |      |             | 9/7  | 10/1  | 11/1           | 12/30 | 1/1   | 12/20            | 1/17 | 2/18  |   |
|                           | 3/26                      |       |     | 6/22        | 7/28 | 8/2  | 9/2         |      |      |             | 9/26 | 10/20 | 11/3           | 12/31 | 1/2   | 12/24            | 2/17 | 2/20* |   |
|                           | 3/27                      |       |     | 6/26        | 7/30 | 8/3  | 9/3         |      |      |             | 9/27 | 10/26 | 11/11          |       |       |                  | 1/3  | 2/23* |   |
|                           |                           |       |     |             |      |      | 8/10        | 9/4  |      |             |      |       |                |       | 1/4   | 2/25*            |      |       |   |
|                           |                           |       |     |             |      |      | 8/11        | 9/5  |      |             |      |       |                |       | 1/5   | 2/26*            |      |       |   |
|                           |                           |       |     |             |      |      | 8/12        |      |      |             |      |       |                | 1/6   | 2/27* |                  |      |       |   |
|                           |                           |       |     |             |      |      | 8/17        |      |      |             |      |       |                |       |       |                  |      |       |   |
|                           |                           |       |     |             |      |      | 8/18        |      |      |             |      |       |                |       |       |                  |      |       |   |
|                           |                           |       |     |             |      |      | 8/19        |      |      |             |      |       |                |       |       |                  |      |       |   |
|                           |                           |       |     |             |      |      | 8/23        |      |      |             |      |       |                |       |       |                  |      |       |   |
|                           |                           |       |     |             |      |      | 8/24        |      |      |             |      |       |                |       |       |                  |      |       |   |
|                           |                           |       |     |             |      |      | 8/27        |      |      |             |      |       |                |       |       |                  |      |       |   |
|                           |                           |       |     |             |      |      | 8/28        |      |      |             |      |       |                |       |       |                  |      |       |   |
|                           |                           |       |     |             |      |      | 8/29        |      |      |             |      |       |                |       |       |                  |      |       |   |
|                           |                           |       |     |             |      |      | 8/31        |      |      |             |      |       |                |       |       |                  |      |       |   |
|                           | <b>n of analysed days</b> | 3     | 0   | 0           | 3    | 3    | 15          | 5    | 0    | 0           | 3    | 3     | 7              | 2     | 6     | 0                | 2    | 2     | 6 |
| <b>samples per season</b> | 3                         |       |     | 21          |      |      | 18          |      |      |             |      |       | 18             |       |       |                  |      |       |   |

\* days with NE wind direction, all others SW wind direction
