# Supplementary material for: Oxidative potential of particulate matter at a German motorway
Source: Royal Society of Chemistry journal article supplement (doi:10.1039/c4em00605d), 2015-01-01
Supplement: c4em00605d2.pdf [file c4em00605d2.pdf]

1 S Table 2 Spearman correlation analyses of the components at the upwind station

| upwind | OM      | EC      | Cl      | SO4    | NO3    | NH4     | Na      | Mg      | Al     | Ca     | V      | Mn      | Fe      | Ni     | Cu      | Zn     | Mo     | Cd     | Sb     | Ba     | Pb     | PM10   | OH·    | NO     | NOx    | NO2    |
|--------|---------|---------|---------|--------|--------|---------|---------|---------|--------|--------|--------|---------|---------|--------|---------|--------|--------|--------|--------|--------|--------|--------|--------|--------|--------|--------|
| OM     | 1       | .864**  | -.432** | .607** | 0.038  | .518**  | -.346** | -0.056  | .628** | .620** | .607** | .718**  | .789**  | .616** | .722**  | .662** | .414** | .585** | .462** | .346** | .665** | .521** | .284*  | .627** | .552** | .449** |
| EC     | .864**  | 1       | -.422** | .690** | 0.244  | .693**  | -.489** | -0.229  | .516** | .529** | .610** | .724**  | .802**  | .663** | .758**  | .685** | .435** | .697** | .605** | .429** | .734** | .563** | 0.251  | .730** | .702** | .624** |
| Cl     | -.432** | -.422** | 1       | -0.072 | .508** | -0.17   | .648**  | .384**  | -.267* | -0.206 | -0.217 | -.360** | -.437** | -0.204 | -.421** | -0.145 | -0.243 | -0.119 | -0.206 | -0.072 | -0.2   | 0.15   | -0.187 | -0.243 | -0.151 | -0.068 |
| SO4    | .607**  | .690**  | -0.072  | 1      | .540** | .788**  | -0.23   | 0.016   | .312*  | .423** | .741** | .491**  | .513**  | .649** | .449**  | .515** | .320*  | .551** | .410** | .388** | .531** | .752** | 0.105  | .500** | .474** | .448** |
| NO3    | 0.038   | 0.244   | .508**  | .540** | 1      | .505**  | 0.069   | -0.028  | -0.148 | -0.022 | 0.187  | 0.053   | -0.02   | 0.219  | -0.014  | .263*  | 0.092  | .394** | 0.22   | .271*  | 0.249  | .521** | -.277* | 0.227  | .352** | .462** |
| NH4    | .518**  | .693**  | -0.17   | .788** | .505** | 1       | -.512** | -.387** | 0.107  | 0.09   | .636** | .323*   | .347**  | .508** | .293*   | .327*  | 0.169  | .502** | .422** | 0.201  | .515** | .693** | -0.17  | .408** | .422** | .426** |
| Na     | -.346** | -.489** | .648**  | -0.23  | 0.069  | -.512** | 1       | .804**  | -0.084 | 0.122  | -0.122 | -0.199  | -0.233  | -0.084 | -0.217  | -0.121 | -0.108 | -.304* | -0.216 | -0.102 | -0.228 | -0.062 | 0.063  | -0.188 | -0.21  | -0.225 |
| Mg     | -0.056  | -0.229  | .384**  | 0.016  | -0.028 | -.387** | .804**  | 1       | .317*  | .504** | 0.084  | 0.167   | 0.131   | 0.12   | 0.072   | 0.071  | 0.043  | -0.168 | -0.092 | 0.12   | -0.057 | 0.171  | .303*  | -0.037 | -0.09  | -0.13  |
| Al     | .628**  | .516**  | -.267*  | .312*  | -0.148 | 0.107   | -0.084  | .317*   | 1      | .790** | .388** | .770**  | .770**  | .487** | .683**  | .550** | .440** | .393** | 0.195  | .468** | .484** | .367** | .561** | .317*  | 0.248  | 0.178  |
| Ca     | .620**  | .529**  | -0.206  | .423** | -0.022 | 0.09    | 0.122   | .504**  | .790** | 1      | .407** | .806**  | .786**  | .560** | .657**  | .709** | .583** | .445** | 0.227  | .424** | .530** | .350** | .503** | .330*  | .270*  | 0.206  |
| V      | .607**  | .610**  | -0.217  | .741** | 0.187  | .636**  | -0.122  | 0.084   | .388** | .407** | 1      | .480**  | .554**  | .685** | .531**  | .492** | 0.24   | .487** | .478** | 0.159  | .625** | .565** | .270*  | .400** | .344** | .279*  |
| Mn     | .718**  | .724**  | -.360** | .491** | 0.053  | .323*   | -0.199  | 0.167   | .770** | .806** | .480** | 1       | .926**  | .621** | .803**  | .802** | .530** | .604** | .430** | .463** | .768** | .430** | .605** | .429** | .412** | .380** |
| Fe     | .789**  | .802**  | -.437** | .513** | -0.02  | .347**  | -0.233  | 0.131   | .770** | .786** | .554** | .926**  | 1       | .712** | .902**  | .737** | .531** | .589** | .584** | .487** | .730** | .370** | .586** | .621** | .585** | .510** |
| Ni     | .616**  | .663**  | -0.204  | .649** | 0.219  | .508**  | -0.084  | 0.12    | .487** | .560** | .685** | .621**  | .712**  | 1      | .662**  | .637** | .478** | .597** | .482** | .401** | .646** | .447** | .309*  | .559** | .510** | .443** |
| Cu     | .722**  | .758**  | -.421** | .449** | -0.014 | .293*   | -0.217  | 0.072   | .683** | .657** | .531** | .803**  | .902**  | .662** | 1       | .699** | .528** | .566** | .594** | .515** | .713** | .313*  | .570** | .685** | .636** | .547** |
| Zn     | .662**  | .685**  | -0.145  | .515** | .263*  | .327*   | -0.121  | 0.071   | .550** | .709** | .492** | .802**  | .737**  | .637** | .699**  | 1      | .597** | .784** | .370** | .400** | .832** | .369** | .434** | .372** | .383** | .382** |
| Mo     | .414**  | .435**  | -0.243  | .320*  | 0.092  | 0.169   | -0.108  | 0.043   | .440** | .583** | 0.24   | .530**  | .531**  | .478** | .528**  | .597** | 1      | .432** | 0.017  | .623** | .449** | 0.02   | 0.206  | 0.24   | 0.221  | 0.195  |
| Cd     | .585**  | .697**  | -0.119  | .551** | .394** | .502**  | -.304*  | -0.168  | .393** | .445** | .487** | .604**  | .589**  | .597** | .566**  | .784** | .432** | 1      | .459** | .353** | .771** | .476** | 0.235  | .438** | .481** | .516** |
| Sb     | .462**  | .605**  | -0.206  | .410** | 0.22   | .422**  | -0.216  | -0.092  | 0.195  | 0.227  | .478** | .430**  | .584**  | .482** | .594**  | .370** | 0.017  | .459** | 1      | .283*  | .528** | .272*  | 0.15   | .656** | .744** | .771** |
| Ba     | .346**  | .429**  | -0.072  | .388** | .271*  | 0.201   | -0.102  | 0.12    | .468** | .424** | 0.159  | .463**  | .487**  | .401** | .515**  | .400** | .623** | .353** | .283*  | 1      | .309*  | 0.219  | 0.198  | .360** | .401** | .444** |
| Pb     | .665**  | .734**  | -0.2    | .531** | 0.249  | .515**  | -0.228  | -0.057  | .484** | .530** | .625** | .768**  | .730**  | .646** | .713**  | .832** | .449** | .771** | .528** | .309*  | 1      | .470** | .454** | .385** | .414** | .437** |
| PM10   | .521**  | .563**  | 0.15    | .752** | .521** | .693**  | -0.062  | 0.171   | .367** | .350** | .565** | .430**  | .370**  | .447** | .313*   | .369** | 0.02   | .476** | .272*  | 0.219  | .470** | 1      | 0.107  | .365** | .326*  | .307*  |
| OH·    | .284*   | 0.251   | -0.187  | 0.105  | -.277* | -0.17   | 0.063   | .303*   | .561** | .503** | .270*  | .605**  | .586**  | .309*  | .570**  | .434** | 0.206  | 0.235  | 0.15   | 0.198  | .454** | 0.107  | 1      | 0.094  | 0.038  | -0.02  |
| NO     | .627**  | .730**  | -0.243  | .500** | 0.227  | .408**  | -0.188  | -0.037  | .317*  | .330*  | .400** | .429**  | .621**  | .559** | .685**  | .372** | 0.24   | .438** | .656** | .360** | .385** | .365** | 0.094  | 1      | .944** | .790** |
| NOx    | .552**  | .702**  | -0.151  | .474** | .352** | .422**  | -0.21   | -0.09   | 0.248  | .270*  | .344** | .412**  | .585**  | .510** | .636**  | .383** | 0.221  | .481** | .744** | .401** | .414** | .326*  | 0.038  | .944** | 1      | .937** |
| NO2    | .449**  | .624**  | -0.068  | .448** | .462** | .426**  | -0.225  | -0.13   | 0.178  | 0.206  | .279*  | .380**  | .510**  | .443** | .547**  | .382** | 0.195  | .516** | .771** | .444** | .437** | .307*  | -0.02  | .790** | .937** | 1      |

\*\* Correlation is significant on level of 0,01 (2-tailed).

\* Correlation is significant on level of 0,05 (2-tailed).

2
