# Supplementary material for: Oxidative potential of particulate matter at a German motorway
Source: Royal Society of Chemistry journal article supplement (doi:10.1039/c4em00605d), 2015-01-01
Supplement: c4em00605d3.pdf [file c4em00605d3.pdf]

1 S Table 3 Spearman correlation analyses of the components at the downwind station

| downwind | OM      | EC      | Cl      | SO4     | NO3     | NH4     | Na      | Mg      | Al     | Ca     | V      | Mn      | Fe      | Ni     | Cu      | Zn     | Mo     | Cd     | Sb      | Ba     | Pb     | PM10    | OH·     | NO     | NOx    | NO2    |
|----------|---------|---------|---------|---------|---------|---------|---------|---------|--------|--------|--------|---------|---------|--------|---------|--------|--------|--------|---------|--------|--------|---------|---------|--------|--------|--------|
| OM       | 1       | .823**  | -.474** | .565**  | 0.094   | .462**  | -.422** | -0.099  | .574** | .474** | .306*  | .735**  | .654**  | .534** | .584**  | .655** | .304*  | .564** | .506**  | .502** | .634** | .388**  | -0.179  | .479** | .553** | .712** |
| EC       | .823**  | 1       | -.462** | .679**  | 0.222   | .606**  | -.467** | -0.138  | .521** | .409** | .441** | .762**  | .673**  | .619** | .613**  | .651** | .297*  | .614** | .558**  | .459** | .697** | .513**  | -.279*  | .554** | .633** | .761** |
| Cl       | -.474** | -.462** | 1       | -0.081  | .473**  | -0.212  | .775**  | .372**  | -0.201 | 0.098  | -0.218 | -.377** | -.614** | -0.234 | -.604** | -0.08  | 0.168  | -0.04  | -.679** | -0.051 | -0.25  | 0.12    | 0.02    | -0.19  | -0.212 | -.271* |
| SO4      | .565**  | .679**  | -0.081  | 1       | .517**  | .765**  | -0.223  | -0.045  | .403** | .431** | .658** | .551**  | .388**  | .659** | .300*   | .522** | .331** | .686** | 0.253   | .338** | .576** | .747**  | -.385** | .268*  | .356** | .560** |
| NO3      | 0.094   | 0.222   | .473**  | .517**  | 1       | .486**  | .267*   | -0.047  | -0.021 | 0.218  | 0.248  | 0.033   | -0.223  | 0.225  | -.256*  | .382** | .340** | .534** | -.318*  | 0.156  | 0.252  | .513**  | -.457** | 0.214  | 0.233  | 0.228  |
| NH4      | .462**  | .606**  | -0.212  | .765**  | .486**  | 1       | -.424** | -.421** | 0.099  | 0.082  | .655** | .291*   | 0.208   | .456** | 0.168   | .332** | 0.142  | .609** | 0.214   | 0.089  | .564** | .725**  | -.600** | 0.159  | 0.228  | .457** |
| Na       | -.422** | -.467** | .775**  | -0.223  | .267*   | -.424** | 1       | .682**  | -0.107 | .259*  | -0.131 | -.262*  | -.344** | -0.074 | -.347** | -0.037 | 0.162  | -0.131 | -.448** | -0.048 | -0.249 | -0.042  | 0.126   | -0.058 | -0.114 | -0.254 |
| Mg       | -0.099  | -0.138  | .372**  | -0.045  | -0.047  | -.421** | .682**  | 1       | .389** | .488** | 0.078  | 0.245   | 0.217   | 0.169  | 0.157   | 0.113  | 0.175  | -0.079 | 0.008   | .266*  | -0.072 | 0.083   | .365**  | 0.1    | 0.083  | -0.001 |
| Al       | .574**  | .521**  | -0.201  | .403**  | -0.021  | 0.099   | -0.107  | .389**  | 1      | .703** | 0.219  | .794**  | .661**  | .514** | .533**  | .540** | .404** | .387** | .317*   | .557** | .442** | .269*   | 0.117   | .279*  | .321*  | .408** |
| Ca       | .474**  | .409**  | 0.098   | .431**  | 0.218   | 0.082   | .259*   | .488**  | .703** | 1      | 0.191  | .608**  | .465**  | .619** | .320*   | .601** | .648** | .445** | 0.059   | .475** | .364** | 0.253   | -0.111  | .347** | .377** | .434** |
| V        | .306*   | .441**  | -0.218  | .658**  | 0.248   | .655**  | -0.131  | 0.078   | 0.219  | 0.191  | 1      | .367**  | .431**  | .653** | .392**  | .321*  | 0.082  | .482** | .388**  | 0.044  | .543** | .567**  | -0.224  | 0.173  | 0.192  | .282*  |
| Mn       | .735**  | .762**  | -.377** | .551**  | 0.033   | .291*   | -.262*  | 0.245   | .794** | .608** | .367** | 1       | .818**  | .616** | .683**  | .716** | .310*  | .593** | .582**  | .498** | .716** | .380**  | 0.06    | .422** | .480** | .599** |
| Fe       | .654**  | .673**  | -.614** | .388**  | -0.223  | 0.208   | -.344** | 0.217   | .661** | .465** | .431** | .818**  | 1       | .573** | .948**  | .460** | 0.243  | .294*  | .840**  | .496** | .489** | 0.191   | 0.131   | .468** | .523** | .607** |
| Ni       | .534**  | .619**  | -0.234  | .659**  | 0.225   | .456**  | -0.074  | 0.169   | .514** | .619** | .653** | .616**  | .573**  | 1      | .463**  | .602** | .470** | .549** | .298*   | .287*  | .585** | .354**  | -.271*  | .417** | .431** | .454** |
| Cu       | .584**  | .613**  | -.604** | .300*   | -.256*  | 0.168   | -.347** | 0.157   | .533** | .320*  | .392** | .683**  | .948**  | .463** | 1       | .334** | 0.236  | 0.162  | .885**  | .493** | .368** | 0.12    | 0.168   | .463** | .520** | .594** |
| Zn       | .655**  | .651**  | -0.08   | .522**  | .382**  | .332**  | -0.037  | 0.113   | .540** | .601** | .321*  | .716**  | .460**  | .602** | .334**  | 1      | .503** | .804** | 0.202   | .400** | .770** | .349**  | -0.149  | .388** | .404** | .424** |
| Mo       | .304*   | .297*   | 0.168   | .331**  | .340**  | 0.142   | 0.162   | 0.175   | .404** | .648** | 0.082  | .310*   | 0.243   | .470** | 0.236   | .503** | 1      | .400** | -0.069  | .506** | 0.24   | 0.006   | -0.147  | .282*  | .299*  | 0.254  |
| Cd       | .564**  | .614**  | -0.04   | .686**  | .534**  | .609**  | -0.131  | -0.079  | .387** | .445** | .482** | .593**  | .294*   | .549** | 0.162   | .804** | .400** | 1      | 0.114   | .261*  | .851** | .563**  | -0.246  | 0.195  | 0.247  | .338** |
| Sb       | .506**  | .558**  | -.679** | 0.253   | -.318*  | 0.214   | -.448** | 0.008   | .317*  | 0.059  | .388** | .582**  | .840**  | .298*  | .885**  | 0.202  | -0.069 | 0.114  | 1       | .369** | .348** | 0.146   | 0.134   | .341** | .402** | .515** |
| Ba       | .502**  | .459**  | -0.051  | .338**  | 0.156   | 0.089   | -0.048  | .266*   | .557** | .475** | 0.044  | .498**  | .496**  | .287*  | .493**  | .400** | .506** | .261*  | .369**  | 1      | 0.202  | 0.18    | 0.07    | .401** | .479** | .524** |
| Pb       | .634**  | .697**  | -0.25   | .576**  | 0.252   | .564**  | -0.249  | -0.072  | .442** | .364** | .543** | .716**  | .489**  | .585** | .368**  | .770** | 0.24   | .851** | .348**  | 0.202  | 1      | .470**  | -0.146  | 0.226  | .284*  | .401** |
| PM10     | .388**  | .513**  | 0.12    | .747**  | .513**  | .725**  | -0.042  | 0.083   | .269*  | 0.253  | .567** | .380**  | 0.191   | .354** | 0.12    | .349** | 0.006  | .563** | 0.146   | 0.18   | .470** | 1       | -.402** | 0.144  | 0.228  | .475** |
| OH·      | -0.179  | -.279*  | 0.02    | -.385** | -.457** | -.600** | 0.126   | .365**  | 0.117  | -0.111 | -0.224 | 0.06    | 0.131   | -.271* | 0.168   | -0.149 | -0.147 | -0.246 | 0.134   | 0.07   | -0.146 | -.402** | 1       | -0.096 | -0.125 | -0.252 |
| NO       | .479**  | .554**  | -0.19   | .268*   | 0.214   | 0.159   | -0.058  | 0.1     | .279*  | .347** | 0.173  | .422**  | .468**  | .417** | .463**  | .388** | .282*  | 0.195  | .341**  | .401** | 0.226  | 0.144   | -0.096  | 1      | .980** | .740** |
| NOx      | .553**  | .633**  | -0.212  | .356**  | 0.233   | 0.228   | -0.114  | 0.083   | .321*  | .377** | 0.192  | .480**  | .523**  | .431** | .520**  | .404** | .299*  | 0.247  | .402**  | .479** | .284*  | 0.228   | -0.125  | .980** | 1      | .838** |
| NO2      | .712**  | .761**  | -.271*  | .560**  | 0.228   | .457**  | -0.254  | -0.001  | .408** | .434** | .282*  | .599**  | .607**  | .454** | .594**  | .424** | 0.254  | .338** | .515**  | .524** | .401** | .475**  | -0.252  | .740** | .838** | 1      |

\*\* Correlation is significant on level of 0,01 (2-tailed).

\* Correlation is significant on level of 0,05 (2-tailed).

2
