# Supplementary material for: Oxidative potential of particulate matter at a German motorway
Source: Royal Society of Chemistry journal article supplement (doi:10.1039/c4em00605d), 2015-01-01
Supplement: c4em00605d4.pdf [file c4em00605d4.pdf]

1 S Table 4 Spearman correlation analyses of the components at the downwind station

| overall | OM      | EC      | Cl      | SO4    | NO3     | NH4     | Na      | Mg      | Al     | Ca     | V      | Mn      | Fe      | Ni     | Cu      | Zn     | Mo     | Cd     | Sb      | Ba     | Pb     | PM10   | OH·     | NO     | NOx    | NO2    |
|---------|---------|---------|---------|--------|---------|---------|---------|---------|--------|--------|--------|---------|---------|--------|---------|--------|--------|--------|---------|--------|--------|--------|---------|--------|--------|--------|
| OM      | 1       | .877**  | -.359** | .553** | 0.079   | .468**  | -.309** | -0.049  | .570** | .586** | .428** | .763**  | .785**  | .559** | .712**  | .664** | .418** | .555** | .608**  | .513** | .625** | .521** | 0.156   | .634** | .651** | .695** |
| EC      | .877**  | 1       | -.287** | .586** | .222*   | .564**  | -.327** | -0.117  | .455** | .516** | .441** | .761**  | .834**  | .567** | .799**  | .642** | .439** | .577** | .727**  | .570** | .631** | .611** | 0.142   | .778** | .800** | .831** |
| Cl      | -.359** | -.287** | 1       | -0.072 | .495**  | -.185*  | .715**  | .390**  | -.227* | -0.031 | -.217* | -.302** | -.341** | -.205* | -.315** | -0.09  | -0.005 | -0.076 | -.277** | 0.012  | -.218* | 0.177  | -0.056  | -0.033 | -0.019 | -0.039 |
| SO4     | .553**  | .586**  | -0.072  | 1      | .528**  | .779**  | -.230*  | -0.013  | .354** | .415** | .699** | .472**  | .380**  | .662** | .285**  | .509** | .308** | .623** | .275**  | .326** | .558** | .723** | -0.156  | .257** | .294** | .403** |
| NO3     | 0.079   | .222*   | .495**  | .528** | 1       | .491**  | 0.176   | -0.029  | -0.089 | 0.099  | .218*  | 0.047   | -0.056  | .232*  | -0.086  | .314** | .202*  | .461** | -0.031  | .187*  | .252** | .509** | -.354** | 0.157  | .211*  | .276** |
| NH4     | .468**  | .564**  | -.185*  | .779** | .491**  | 1       | -.466** | -.403** | 0.106  | 0.081  | .644** | .297**  | .262**  | .501** | .201*   | .321** | 0.147  | .554** | .256**  | 0.144  | .539** | .686** | -.357** | .213*  | .254** | .372** |
| Na      | -.309** | -.327** | .715**  | -.230* | 0.176   | -.466** | 1       | .743**  | -0.093 | .205*  | -0.135 | -.189*  | -0.171  | -0.094 | -0.152  | -0.064 | 0.046  | -.210* | -.208*  | -0.004 | -.230* | -0.019 | 0.096   | 0.004  | -0.025 | -0.101 |
| Mg      | -0.049  | -0.117  | .390**  | -0.013 | -0.029  | -.403** | .743**  | 1       | .353** | .503** | 0.08   | .199*   | 0.174   | 0.138  | 0.113   | 0.101  | 0.109  | -0.116 | 0.009   | .214*  | -0.055 | 0.138  | .317**  | 0.05   | 0.031  | -0.002 |
| Al      | .570**  | .455**  | -.227*  | .354** | -0.089  | 0.106   | -0.093  | .353**  | 1      | .740** | .312** | .731**  | .595**  | .501** | .486**  | .545** | .413** | .397** | .242**  | .487** | .463** | .307** | .322**  | .224*  | .227*  | .261** |
| Ca      | .586**  | .516**  | -0.031  | .415** | 0.099   | 0.081   | .205*   | .503**  | .740** | 1      | .291** | .732**  | .633**  | .556** | .505**  | .683** | .616** | .451** | .262**  | .514** | .455** | .349** | .223*   | .387** | .391** | .413** |
| V       | .428**  | .441**  | -.217*  | .699** | .218*   | .644**  | -0.135  | 0.08    | .312** | .291** | 1      | .384**  | .391**  | .672** | .347**  | .397** | 0.141  | .490** | .327**  | 0.092  | .586** | .540** | 0.01    | 0.162  | 0.169  | .222*  |
| Mn      | .763**  | .761**  | -.302** | .472** | 0.047   | .297**  | -.189*  | .199*   | .731** | .732** | .384** | 1       | .863**  | .571** | .751**  | .759** | .453** | .587** | .589**  | .554** | .713** | .447** | .398**  | .517** | .543** | .589** |
| Fe      | .785**  | .834**  | -.341** | .380** | -0.056  | .262**  | -0.171  | 0.174   | .595** | .633** | .391** | .863**  | 1       | .539** | .940**  | .572** | .443** | .403** | .836**  | .624** | .526** | .410** | .441**  | .758** | .767** | .769** |
| Ni      | .559**  | .567**  | -.205*  | .662** | .232*   | .501**  | -0.094  | 0.138   | .501** | .556** | .672** | .571**  | .539**  | 1      | .454**  | .616** | .453** | .586** | .343**  | .331** | .623** | .418** | -0.007  | .339** | .349** | .390** |
| Cu      | .712**  | .799**  | -.315** | .285** | -0.086  | .201*   | -0.152  | 0.113   | .486** | .505** | .347** | .751**  | .940**  | .454** | 1       | .501** | .441** | .321** | .858**  | .631** | .463** | .348** | .473**  | .786** | .792** | .781** |
| Zn      | .664**  | .642**  | -0.09   | .509** | .314**  | .321**  | -0.064  | 0.101   | .545** | .683** | .397** | .759**  | .572**  | .616** | .501**  | 1      | .560** | .794** | .327**  | .431** | .797** | .384** | 0.166   | .359** | .386** | .430** |
| Mo      | .418**  | .439**  | -0.005  | .308** | .202*   | 0.147   | 0.046   | 0.109   | .413** | .616** | 0.141  | .453**  | .443**  | .453** | .441**  | .560** | 1      | .406** | 0.143   | .621** | .337** | 0.087  | 0.071   | .369** | .377** | .373** |
| Cd      | .555**  | .577**  | -0.076  | .623** | .461**  | .554**  | -.210*  | -0.116  | .397** | .451** | .490** | .587**  | .403**  | .586** | .321**  | .794** | .406** | 1      | .258**  | .301** | .812** | .511** | -0.005  | .242** | .289** | .377** |
| Sb      | .608**  | .727**  | -.277** | .275** | -0.031  | .256**  | -.208*  | 0.009   | .242** | .262** | .327** | .589**  | .836**  | .343** | .858**  | .327** | 0.143  | .258** | 1       | .496** | .379** | .339** | .351**  | .745** | .773** | .781** |
| Ba      | .513**  | .570**  | 0.012   | .326** | .187*   | 0.144   | -0.004  | .214*   | .487** | .514** | 0.092  | .554**  | .624**  | .331** | .631**  | .431** | .621** | .301** | .496**  | 1      | .265** | .301** | .250**  | .558** | .588** | .618** |
| Pb      | .625**  | .631**  | -.218*  | .558** | .252**  | .539**  | -.230*  | -0.055  | .463** | .455** | .586** | .713**  | .526**  | .623** | .463**  | .797** | .337** | .812** | .379**  | .265** | 1      | .473** | 0.148   | .247** | .290** | .381** |
| PM10    | .521**  | .611**  | 0.177   | .723** | .509**  | .686**  | -0.019  | 0.138   | .307** | .349** | .540** | .447**  | .410**  | .418** | .348**  | .384** | 0.087  | .511** | .339**  | .301** | .473** | 1      | -0.058  | .387** | .413** | .506** |
| OH·     | 0.156   | 0.142   | -0.056  | -0.156 | -.354** | -.357** | 0.096   | .317**  | .322** | .223*  | 0.01   | .398**  | .441**  | -0.007 | .473**  | 0.166  | 0.071  | -0.005 | .351**  | .250** | 0.148  | -0.058 | 1       | .252** | .216*  | 0.117  |
| NO      | .634**  | .778**  | -0.033  | .257** | 0.157   | .213*   | 0.004   | 0.05    | .224*  | .387** | 0.162  | .517**  | .758**  | .339** | .786**  | .359** | .369** | .242** | .745**  | .558** | .247** | .387** | .252**  | 1      | .987** | .897** |
| NOx     | .651**  | .800**  | -0.019  | .294** | .211*   | .254**  | -0.025  | 0.031   | .227*  | .391** | 0.169  | .543**  | .767**  | .349** | .792**  | .386** | .377** | .289** | .773**  | .588** | .290** | .413** | .216*   | .987** | 1      | .947** |
| NO2     | .695**  | .831**  | -0.039  | .403** | .276**  | .372**  | -0.101  | -0.002  | .261** | .413** | .222*  | .589**  | .769**  | .390** | .781**  | .430** | .373** | .377** | .781**  | .618** | .381** | .506** | 0.117   | .897** | .947** | 1      |

\*\* Correlation is significant on level of 0,01 (2-tailed).

\* Correlation is significant on level of 0,05 (2-tailed).

2
